# Supplementary material for: Prognostic Value of Circulating Cytokines in Chemorefractory Colorectal Cancer
Source: MDPI journal article supplement (doi:10.3390/cancers15245823), 2023-12-13
Supplement: s1 [file s1]

## Supplementary files

**Table S1.** Dilution, range, and sensitivity for cytokines tested by ELISA in the validation cohort

|         | Dilution           |                | Range                   | Sensitivity |
|---------|--------------------|----------------|-------------------------|-------------|
|         | Healthy volunteers | Study patients |                         |             |
| IGFBP-1 | 100x               | 200x           | 31.2 pg/mL - 2000 pg/mL | 1 pg/mL     |
| IGFBP-2 | 100x               | 300x           | 8.23 pg/mL - 6000 pg/mL | 20 pg/mL    |
| SAA     | 300x               | 2000x          | 0.41 ng/mL - 300 ng/mL  | 0.5 ng/mL   |
| ANG-II  | no dilution        |                | 31.25 pg/mL - 2000 pg/m | 18.75 pg/mL |

**Abbreviations:** ANG-II, Angiotensin II; IGFBP-1, insulin-like growth factor-binding protein 1; IGFBP-2, insulin-like growth factor-binding protein 2; SAA, Serum Amyloid A.

**Figure S1.** Principal component analysis of cytokine expression by source study in the discovery cohort

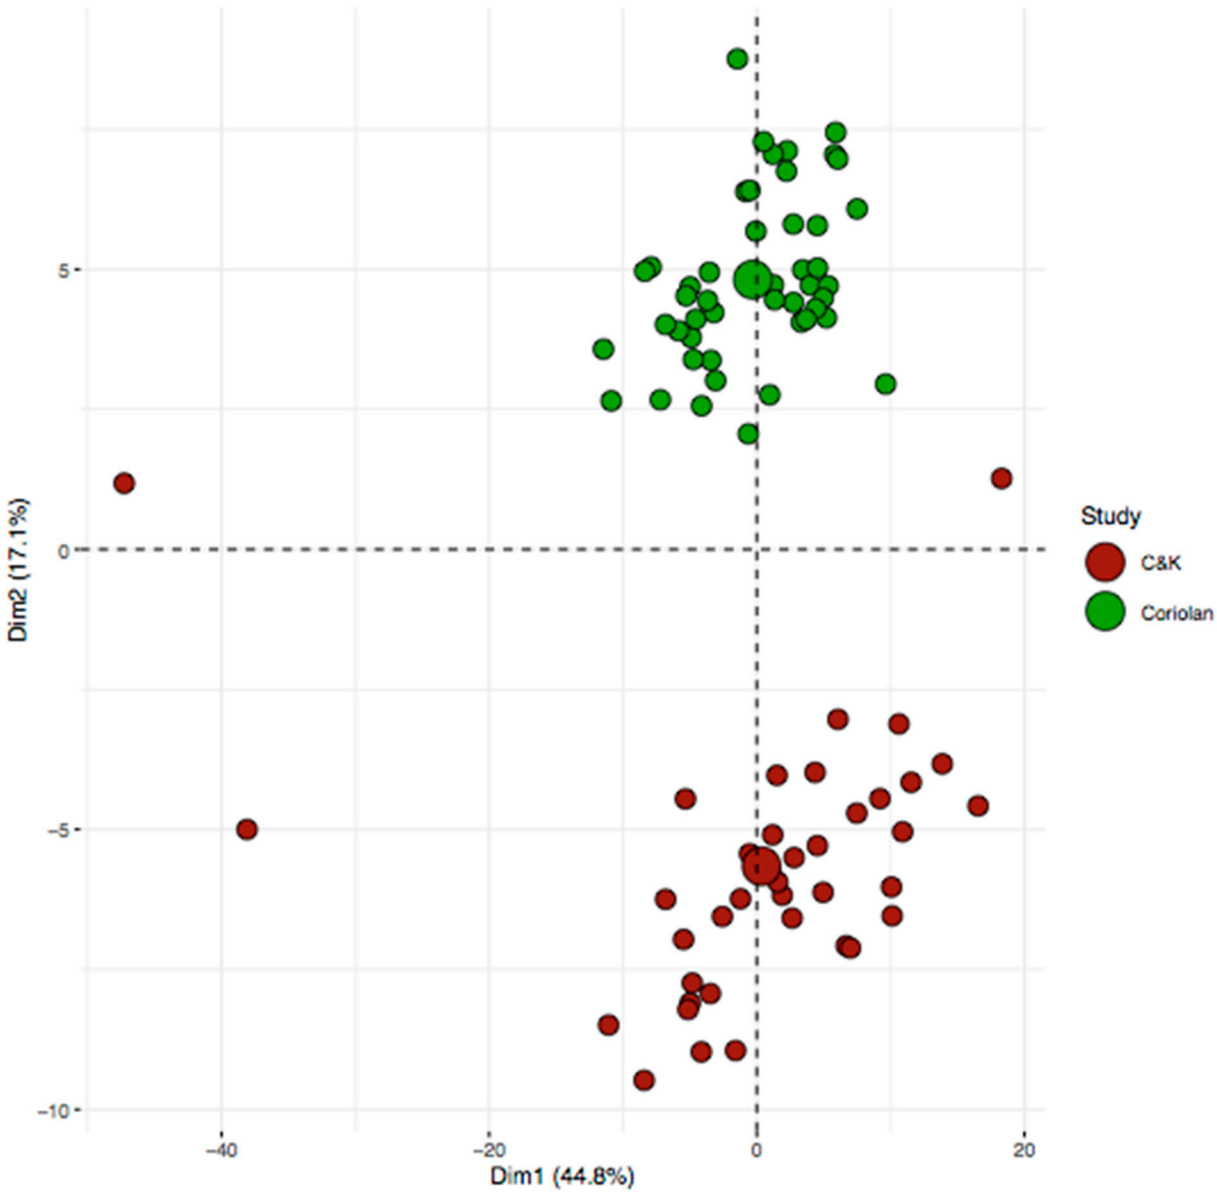

*Abbreviations: C&K, Chronos & Kairos.*

**Figure S2.** Kaplan-Meier curve for overall survival by expression of (a) Angiotensin II and (b) Serum Amyloid A and in the discovery cohort

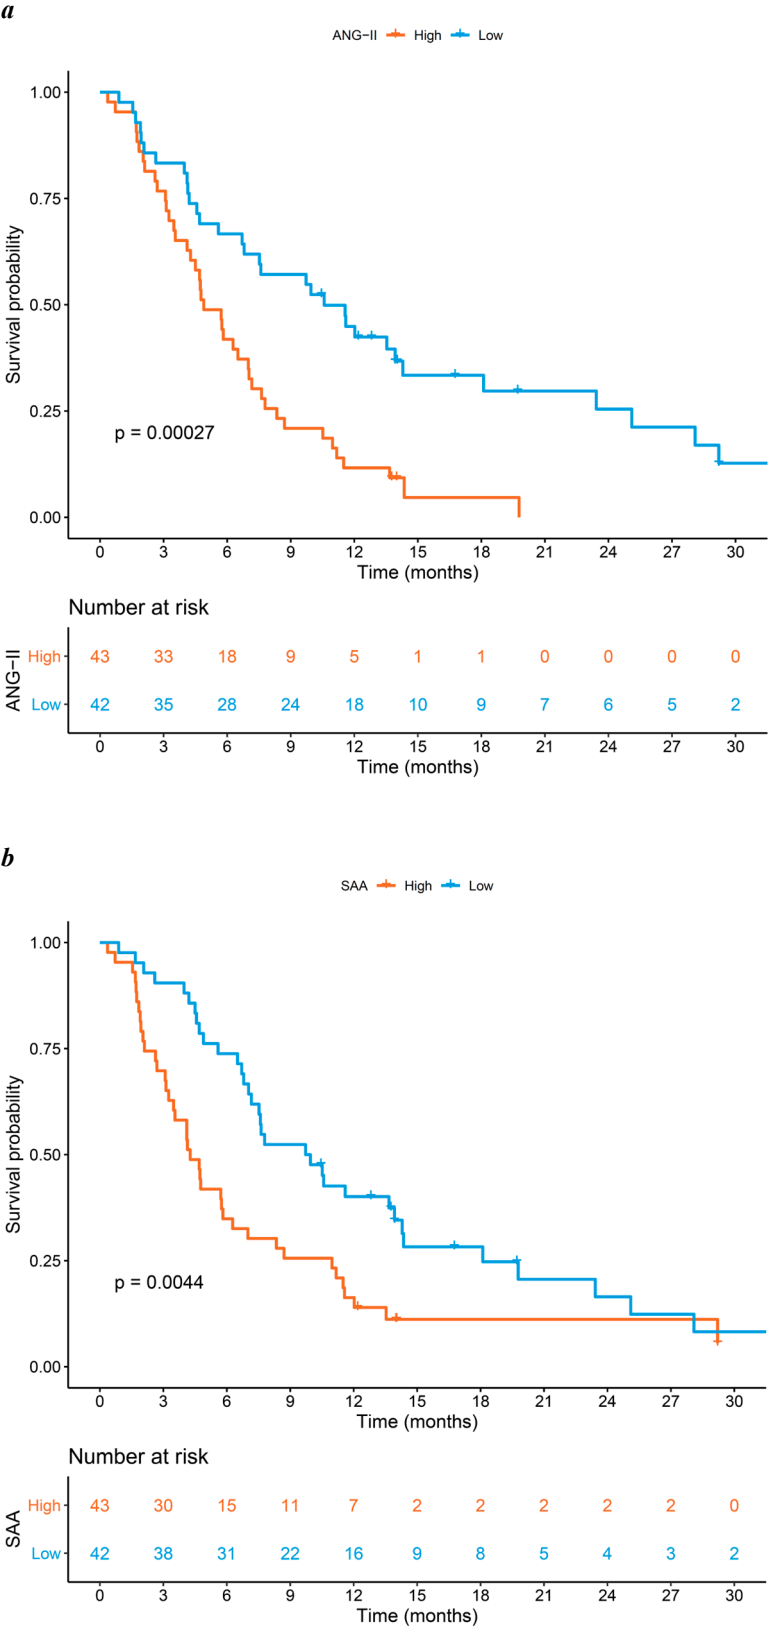

**Abbreviations:** ANG-II, Angiotensin II; SAA, Serum Amyloid A.

**Table S2.** Median values of IGFBP1, IGFBP2, SAA and angiotensin II in patients from the validation cohort and healthy volunteers

|                                  | Validation cohort | Healthy volunteers |
|----------------------------------|-------------------|--------------------|
| IGFBP1 (pg/ml)<br>Median         | 42,821            | 33,292             |
| IGFBP2 (pg/ml)<br>Median         | 696,509           | 508,958            |
| SAA (ng/ml)<br>Median            | 8,418             | 1,962              |
| Angiotensin II (pg/ml)<br>Median | 703               | 921                |

**Abbreviations:** ANG-II, Angiotensin II; IGFBP-1, insulin-like growth factor-binding protein 1; IGFBP-2, insulin-like growth factor-binding protein 2; SAA, Serum Amyloid A;

**Figure S3.** Correlation between the cytokines analysed in the validation cohort (Spearman rank correlation)

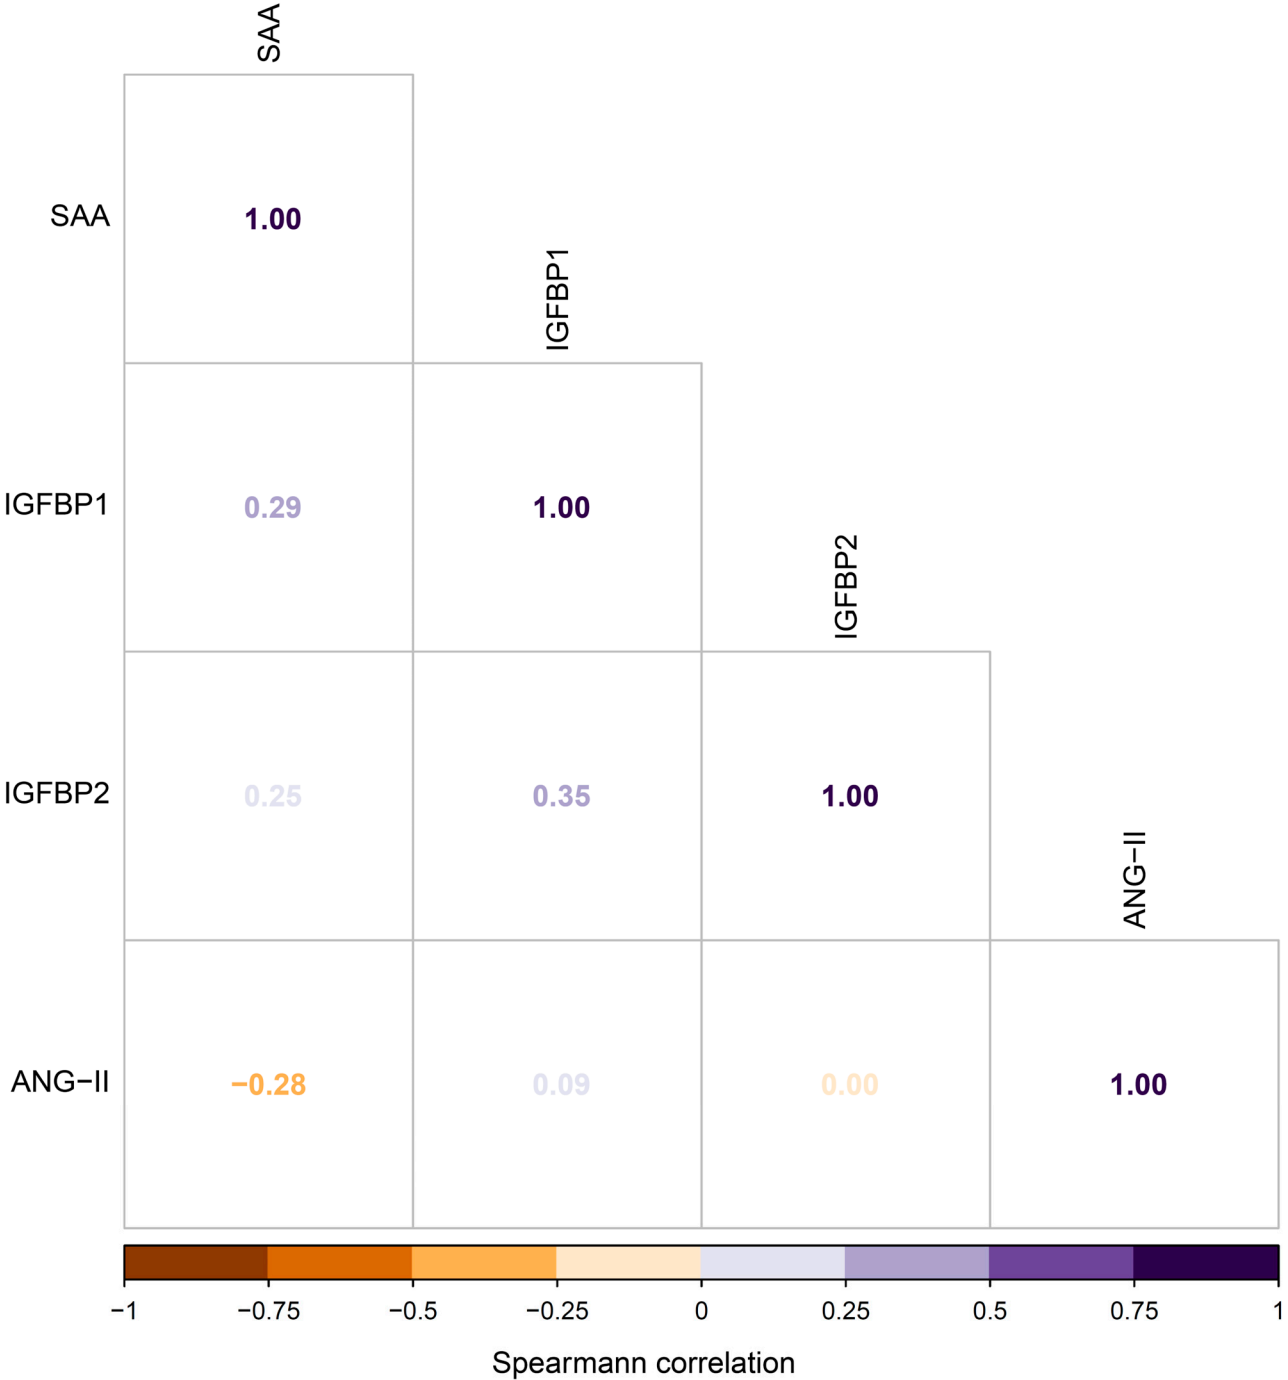

**Figure S4.** Kaplan-Meier curve for overall survival by expression of (a) Angiotensin II and (b) Serum Amyloid A and in the validation cohort

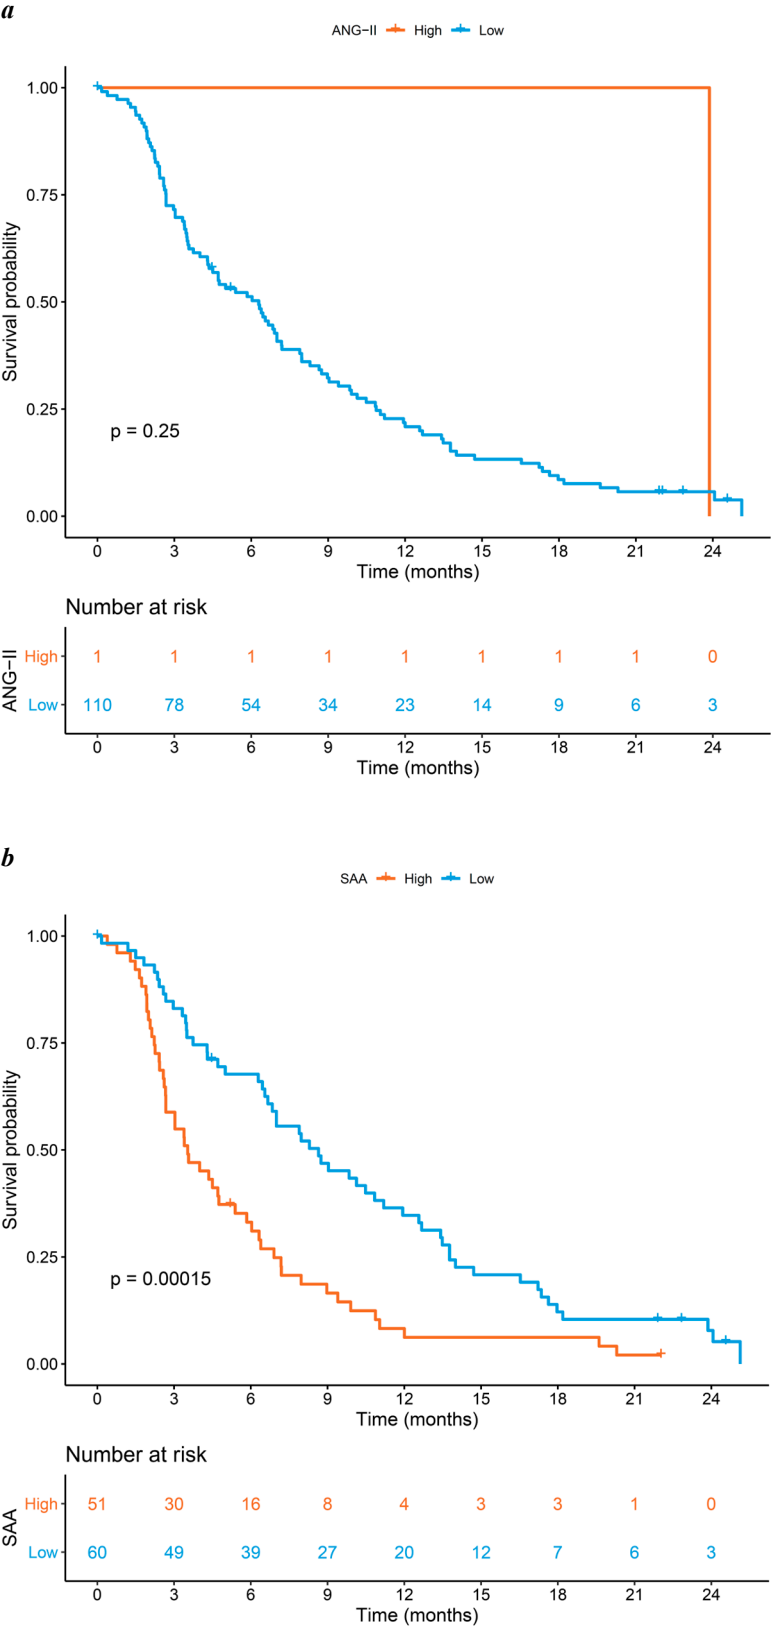

**Abbreviations:** ANG-II, Angiotensin II; SAA, Serum Amyloid A.

**Table S3.** Univariable and multivariable analyses in the validation cohort

| Cytokine        | Univariable analysis |       | Multivariable analysis |        |
|-----------------|----------------------|-------|------------------------|--------|
|                 | HR (95% CI)          | FDR   | HR (95% CI)            | FDR    |
| IGFBP1          | 2.04 (1.20-3.45)     | 0.024 | 2.70 (1.56-4.76)       | 0.006  |
| IGFBP2          | 4.17 (2.08-8.33)     | 0.001 | 3.33 (1.61-6.67)       | 0.008  |
| SAA             | 2.13 (1.43-3.23)     | 0.001 | 1.54 (0.99-2.44)       | 0.092  |
| IGFBP1 + IGFBP2 | 2.44 (1.52-4.0)      | 0.002 | 3.03 (1.79-5.0)        | <0.001 |

**Abbreviations:** ANG-II, Angiotensin II; IGFBP-1, insulin-like growth factor-binding protein 1; IGFBP-2, insulin-like growth factor-binding protein 2; SAA, Serum Amyloid A; FDR, false discovery rate; HR, hazard ratio; CI, confidence intervals.

**Table S4.** Patient characteristics according to the expression of IGFBP-1 and/or IGFBP-2 in the validation cohort

|                                                                                           | IGFBP-1 and IGFBP-2<br>low expression<br>(N=87) | IGFBP-1 and/or IGFBP-2<br>high expression<br>(N=24) |
|-------------------------------------------------------------------------------------------|-------------------------------------------------|-----------------------------------------------------|
| Age<br>median (IQR)                                                                       | 66 (9)                                          | 67 (8)                                              |
| Sex<br>Male<br>female                                                                     | 53 (60.9%)<br>34 (39.1%)                        | 13 (54.2%)<br>11 (45.8%)                            |
| ECOG PS<br>0<br>≥1                                                                        | 44 (50.5%)<br>43 (49.5%)                        | 7 (29.2%)<br>17 (70.8%)                             |
| Primary tumor location<br>Left<br>Right<br>Unknown                                        | 61 (70.1%)<br>15 (17.2%)<br>11 (12.7%)          | 13 (54.2%)<br>5 (20.8%)<br>6 (25%)                  |
| <i>RAS/BRAF</i> status<br><i>RAS/BRAF</i> mutated<br><i>RAS/BRAF</i> wild-type<br>Unknown | 56 (64.3%)<br>30 (34.5%)<br>1 (1.2%)            | 15 (62.5%)<br>8 (33%)<br>1 (4.5%)                   |
| N of metastatic sites<br>1<br>≥2                                                          | 12 (13.8%)<br>75 (86.2%)                        | 2 (8.4%)<br>22 (91.6%)                              |
| Liver metastasis<br>Present<br>Absent                                                     | 63 (72.4%)<br>24 (27.6%)                        | 19 (79.2%)<br>5 (20.8%)                             |
| Peritoneal metastasis<br>Present<br>Absent                                                | 15 (17.2%)<br>72 (82.8%)                        | 6 (25%)<br>18 (75%)                                 |
| Baseline ALP<br>Median (IQR)                                                              | 151 (189)                                       | 239 (308)                                           |
| Baseline CEA<br>Median (IQR)                                                              | 117 (311)                                       | 137 (833)                                           |
| Time from diagnosis to blood sampling<br>median (IQR)                                     | 40 (36)                                         | 25 (36.9)                                           |

**Abbreviations:** ALP, alkaline phosphatase; CEA, carcinoembryonic antigen; ECOG, Eastern Cooperative Oncology Group; IQR, interquartile range.
